# Supplementary material for: A SMAD1/5-YAP signaling module drives radial glia self-amplification and growth of the developing cerebral cortex
Source: Oxford University Press journal article supplement (doi:10.1242/dev.187005), 2020-01-01
Supplement: dev187005supp.pdf [file dev187005supp.pdf]

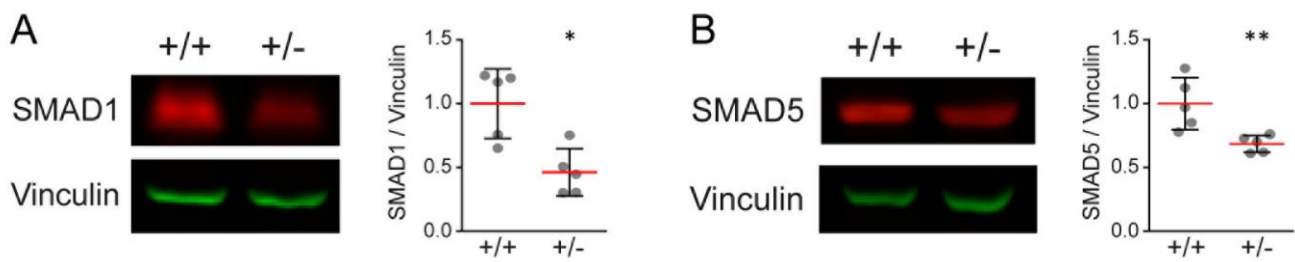

**Figure S1: Reduction in SMAD1/5 protein levels in the *SmadNes* heterozygous mutant mouse.**

(A-B) The levels of SMAD1 (A) and SMAD5 (B) proteins were assessed by Western blot in extracts obtained from telencephalons of E11.5 *SmadNes* heterozygous mutant embryos (*Smad1<sup>wt/fl</sup>;Smad5<sup>wt/fl</sup>;Nestin:Cre<sup>+/-</sup>*, +/-) and their control littermates (*Smad1<sup>wt/fl</sup>;Smad5<sup>wt/fl</sup>;Nestin:Cre<sup>0/0</sup>*, +/+), relative to the levels of Vinculin. The data represent the mean ratio  $\pm$  s.d obtained from 5 mutant embryos and 5 control littermates. Significance was assessed with the non-parametric Mann–Whitney test (A, B). \* $P < 0.05$ , \*\* $P < 0.01$ .

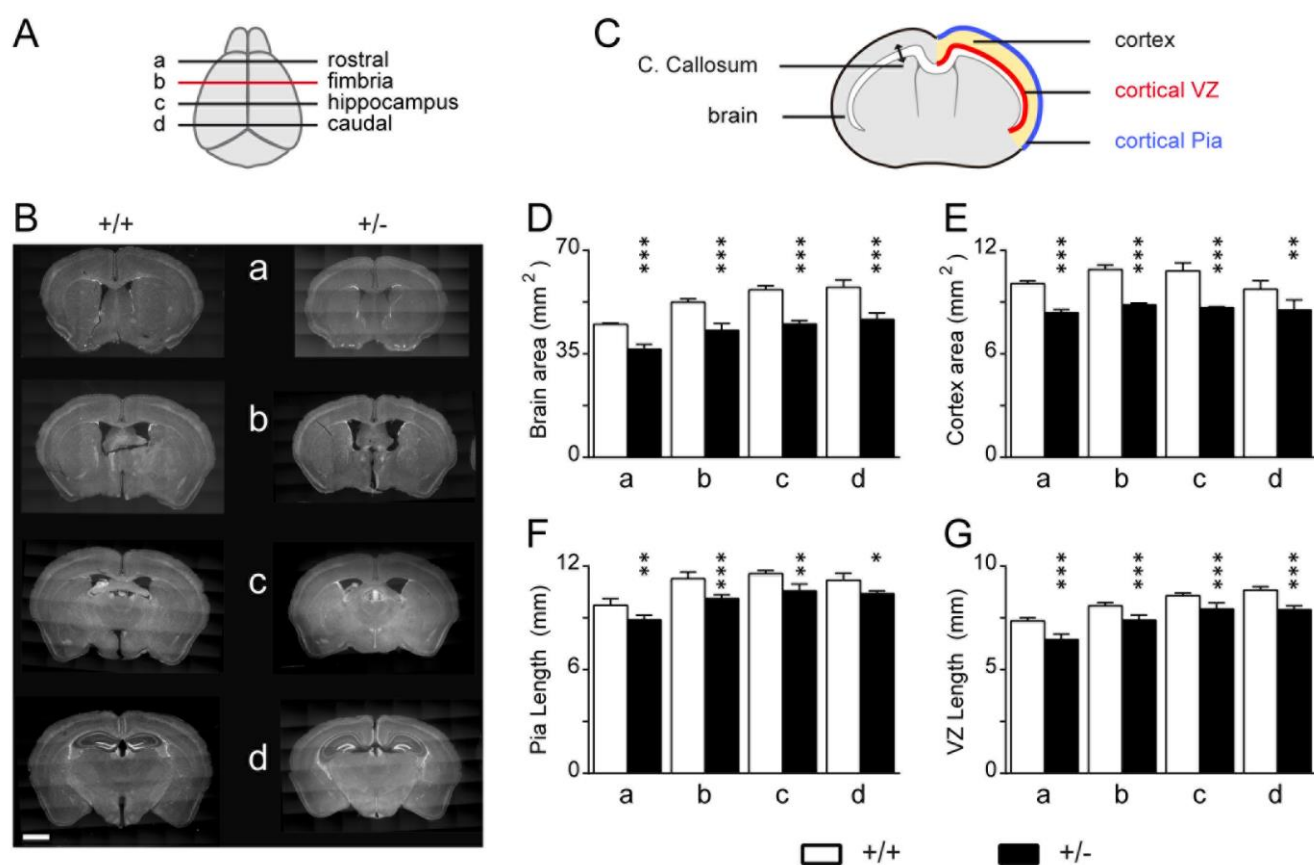

**Figure S2: The size reduction of the adult *SmadNes* mutant brain is constant across the rostral-caudal axis.**

(A) Representative rostral-caudal levels and (B) coronal sections of the adult brain (P60) of the *SmadNes* mutant mice (*Smad1<sup>wt/fl</sup>;Smad5<sup>wt/fl</sup>;Nestin:Cre<sup>+/-</sup>*, +/-) and their control littermates (*Smad1<sup>wt/fl</sup>;Smad5<sup>wt/fl</sup>;Nestin:Cre<sup>0/0</sup>*, +/+) in 4 different positions along the rostral-caudal axis (a to d, from rostral to caudal; b is also shown in Fig.1J), and (C) the distinct parameters analysed. (D,E) Mean area  $\pm$  s.d of (D) the whole brain and of (E) the cerebral cortex. (F,G) Mean length  $\pm$  s.d of (F) the cortical pia and of (G) the cortical VZ. n=5 embryos for +/+, n=3 for +/- . Significance was assessed with a two-way ANOVA + Sidak's test (D-G). \*P<0.05, \*\*P<0.01, \*\*\*P<0.001. Scale bar: 250  $\mu$ m.

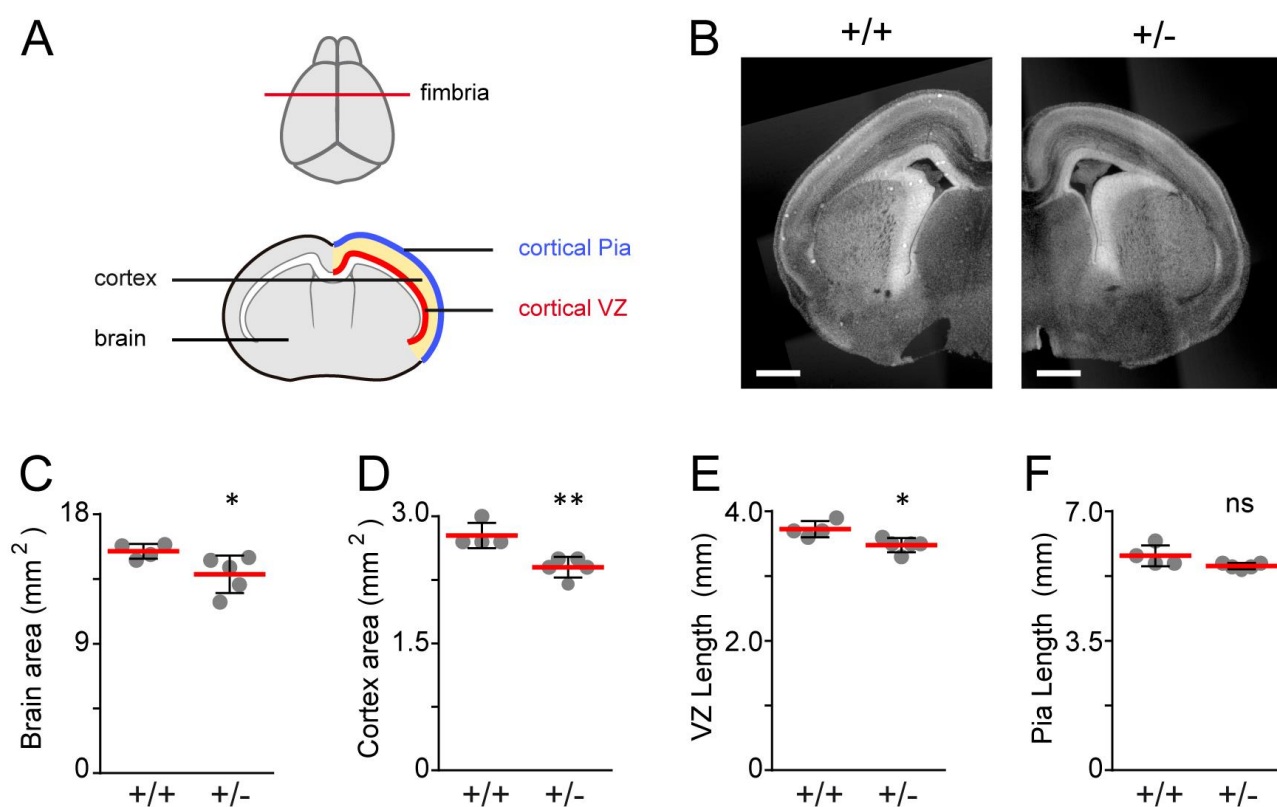

**Figure S3: The size of the SmadNes mutant brain is reduced at the embryonic stage E17.5.**

(A) Representative rostral-caudal level and the distinct parameters analysed on (B) coronal brain sections of E17.5 SmadNes mutant embryos (*Smad1*<sup>wt/fl</sup>;*Smad5*<sup>wt/fl</sup>;*Nestin:Cre*<sup>+/-</sup>, +/-) and control littermates (*Smad1*<sup>wt/fl</sup>;*Smad5*<sup>wt/fl</sup>;*Nestin:Cre*<sup>0/0</sup>, +/+). (C,D) Mean area  $\pm$  s.d of (C) the whole brain and of (D) the cerebral cortex. (E,F) Mean length  $\pm$  s.d of (E) the cortical VZ and of (F) the cortical pia, obtained from  $n=5$  SmadNes mutant embryos (+/-) and 4 control littermates (+/+). Significance was assessed with the non-parametric Mann-Whitney test (C-F). \* $P<0.05$ , \*\* $P<0.01$ , ns: $P>0.05$ . Scale bar: 500  $\mu$ m.

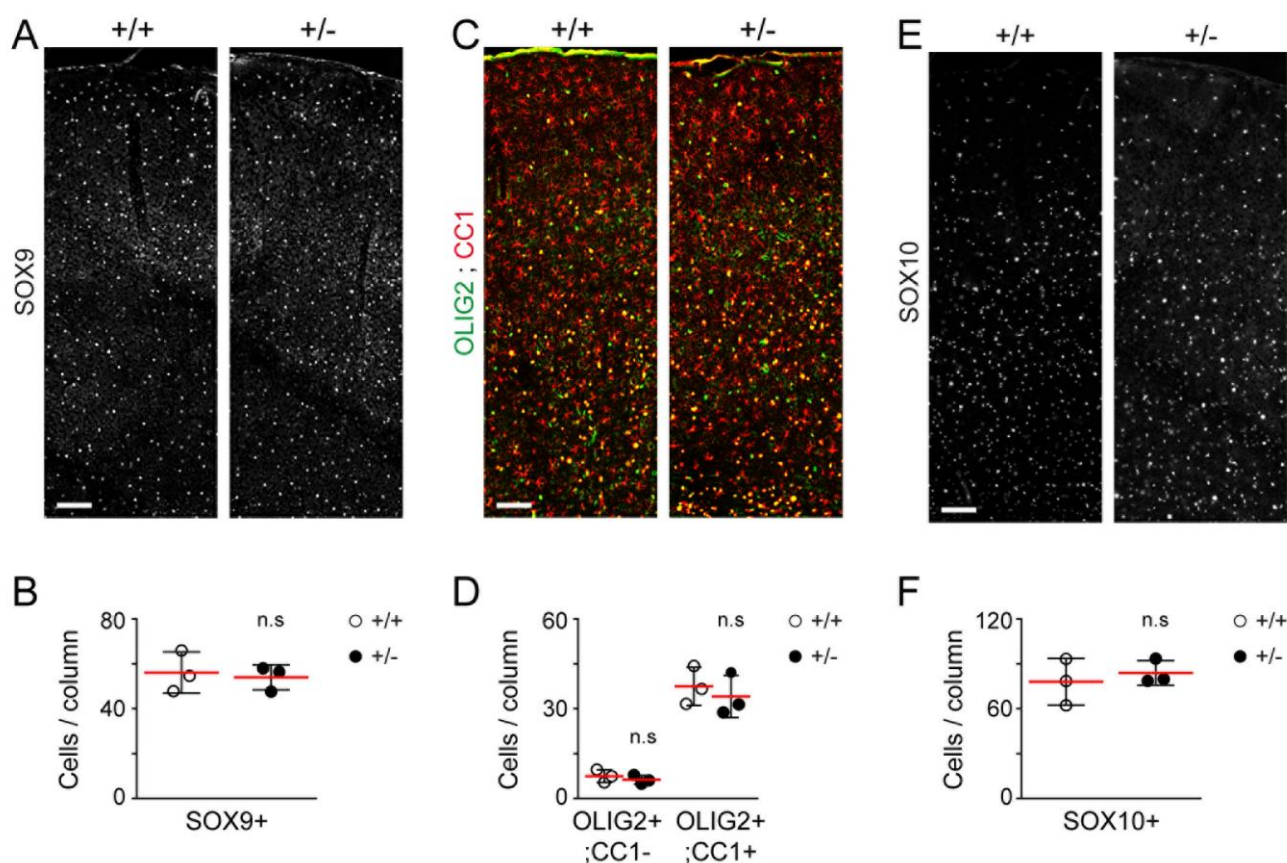

### Figure S4: No alteration in the density of macroglial cells in the cerebral cortex of *SmadNes* mutant mice.

The density of macroglial cells present in the brains of *SmadNes* mutant mice (*Smad1<sup>wt/fl</sup>;Smad5<sup>wt/fl</sup>;Nestin:Cre<sup>+0</sup>*, +/-) and their control littermates (*Smad1<sup>wt/fl</sup>;Smad5<sup>wt/fl</sup>;Nestin:Cre<sup>0/0</sup>*, +/+) was assessed in coronal sections at P60. (A, B) SOX9<sup>+</sup> astrocytes and (C-F) oligodendroglial cells identified as (C, D) OLIG2<sup>+</sup>;CC1<sup>+</sup> oligodendrocytes and their OLIG2<sup>+</sup>;CC1<sup>-</sup> progenitors or as (E, F) SOX10<sup>+</sup> oligodendroglial cells, and (B, D, F) their mean number  $\pm$  s.d quantified in a 100  $\mu$ m-wide radial column, obtained from 3 +/+ and 3 +/- animals. Significance was assessed with the non-parametric Mann-Whitney test. ns:  $P > 0.05$ . Scale bars, 100  $\mu$ m.

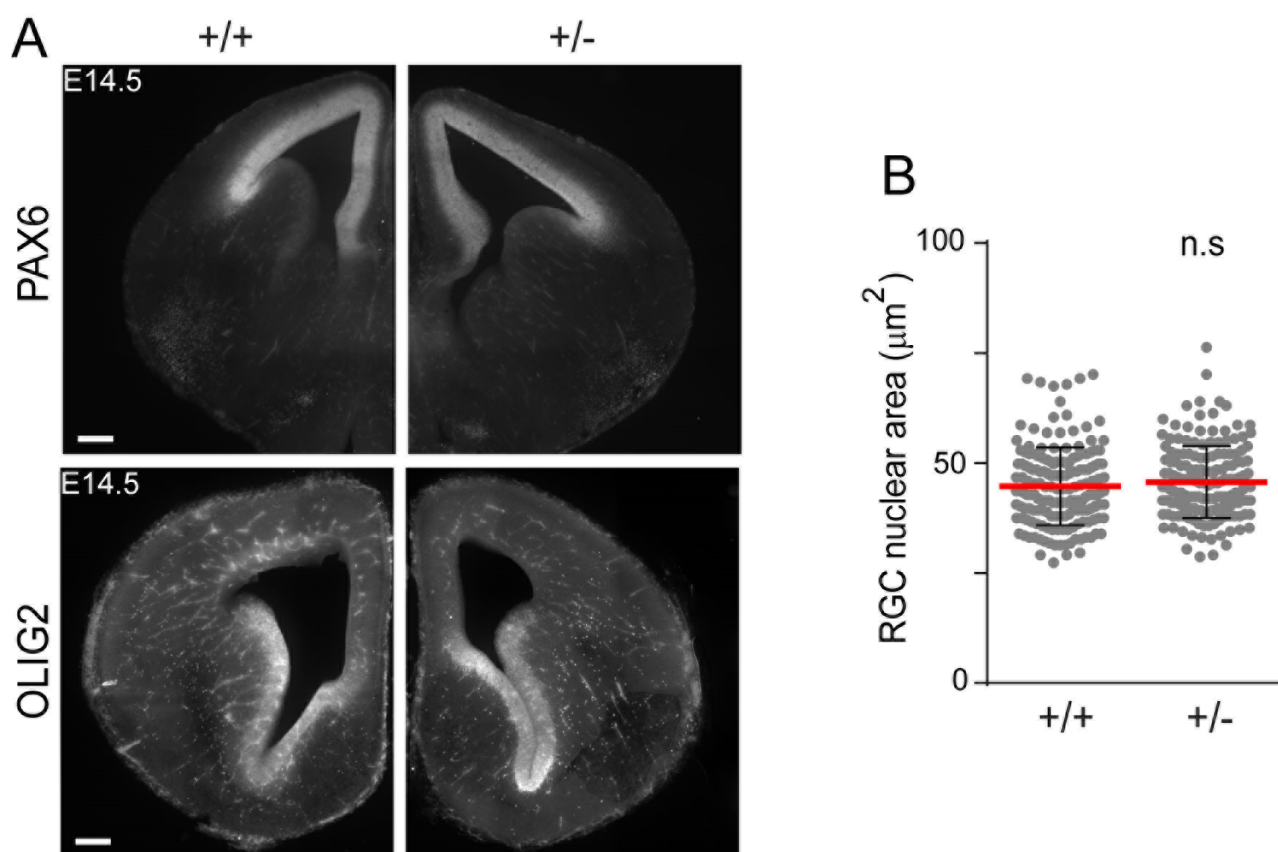

**Figure S5: Absence of patterning and cell size defects in the cerebral cortex of SmadNes mutant embryos.**

(A) Coronal sections immunostained for the pallial and sub-pallial patterning markers PAX6 and OLIG2 in the telencephalon of E14.5 SmadNes mutant embryos (*Smad1<sup>wt/fl</sup>;Smad5<sup>wt/fl</sup>;Nestin:Cre<sup>+0</sup>*, +/-) and their control littermates (*Smad1<sup>wt/fl</sup>;Smad5<sup>wt/fl</sup>;Nestin:Cre<sup>0/0</sup>*, +/+). (B) Mean nuclear area  $\pm$  s.d of the PAX6+;TBR2- RGCs in the ventricular zone of E11.5 SmadNes mutant embryos and control littermates, quantified in 170 cells derived from 5 embryos for each genotype. Each dot represents the value of 1 cell. Significance was assessed with the non-parametric Mann–Whitney test (B). ns:  $P > 0.05$ . Scale bars, 100  $\mu\text{m}$ .

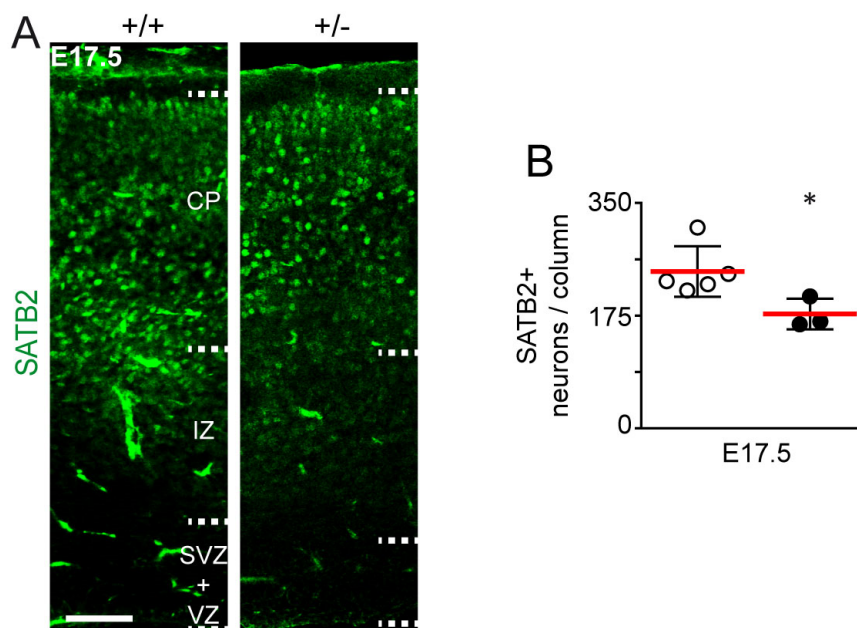

**Figure S6: The number of SATB2+ neurons is decreased in the cerebral cortex of SmadNes mutant embryos.**

(A) Immunostaining for SATB2, which reveals mid- and late-born projection neurons, in the developing cerebral cortex of E17.5 SmadNes mutant embryos (*Smad1<sup>wt/fl</sup>;Smad5<sup>wt/fl</sup>;Nestin:Cre<sup>+0</sup>*, +/-) and control littermates (*Smad1<sup>wt/fl</sup>;Smad5<sup>wt/fl</sup>;Nestin:Cre<sup>0/0</sup>*, +/+). (B) Mean number of SATB2+ neurons  $\pm$  s.d. quantified in a 100  $\mu$ m-wide cortical area, obtained from 5 +/+ and 3 +/- embryos. Significance was assessed with the non-parametric Mann–Whitney test. \* $P < 0.05$ . Scale bar, 50  $\mu$ m. CP: cortical plate, IZ: intermediate zone, SVZ: sub-ventricular zone, VZ: ventricular zone.

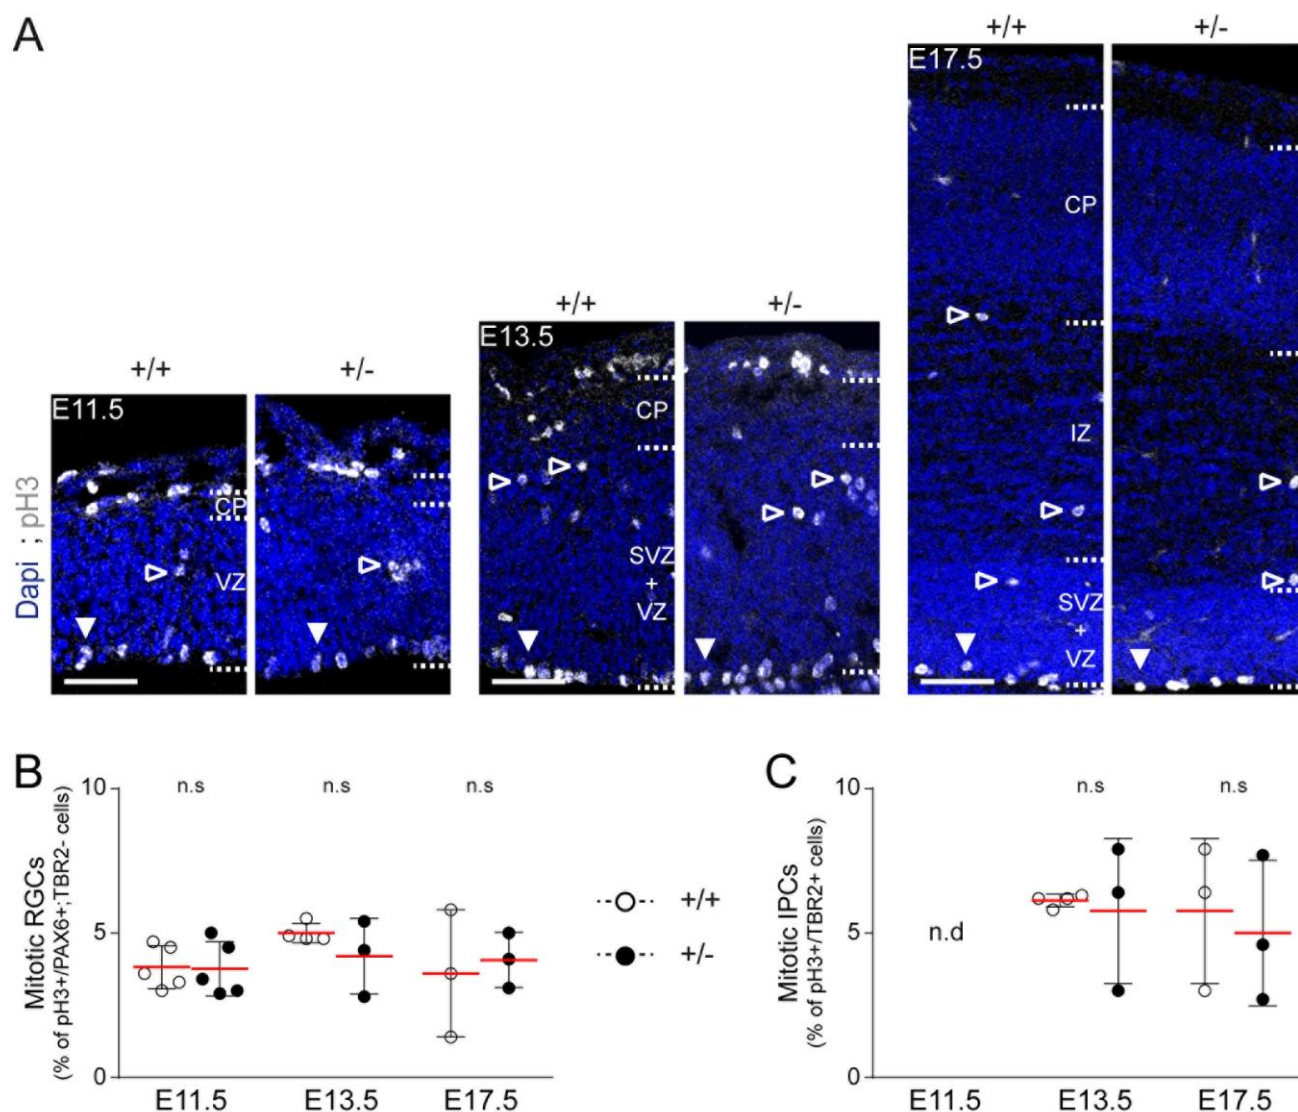

**Figure S7: The mitotic index of RGCs and IPCs is not altered in the cerebral cortex of *SmadNes* mutant embryos.**

(A) Coronal sections showing apical (white arrowheads) and basal (black arrowheads) pH3+ mitoses in the developing cerebral cortex of *SmadNes* mutant embryos (*Smad1<sup>wt/fl</sup>;Smad5<sup>wt/fl</sup>;Nestin:Cre<sup>+/-</sup>*, +/-) and control littermates (*Smad1<sup>wt/fl</sup>;Smad5<sup>wt/fl</sup>;Nestin:Cre<sup>0/0</sup>*, +/+) at E11.5, E13.5 and E17.5. (B, C) Mean proportion  $\pm$  s.d of (B) pH3+/PAX6+;TBR2- cells (mitotic RGCs) and (C) pH3+/TBR2+ cells (mitotic IPCs) quantified in a 100  $\mu$ m-wide cortical area, obtained from 5, 4, 3 +/+ and 5, 3, 3 +/- embryos at E11.5, E13.5 and E17.5, respectively. Significance was assessed at each developmental stage with the two-sided unpaired t-test. ns:  $P > 0.05$ ; nd: not determined. Scale bars, 50  $\mu$ m. CP: cortical plate, IZ: intermediate zone, SVZ: sub-ventricular zone, VZ: ventricular zone.

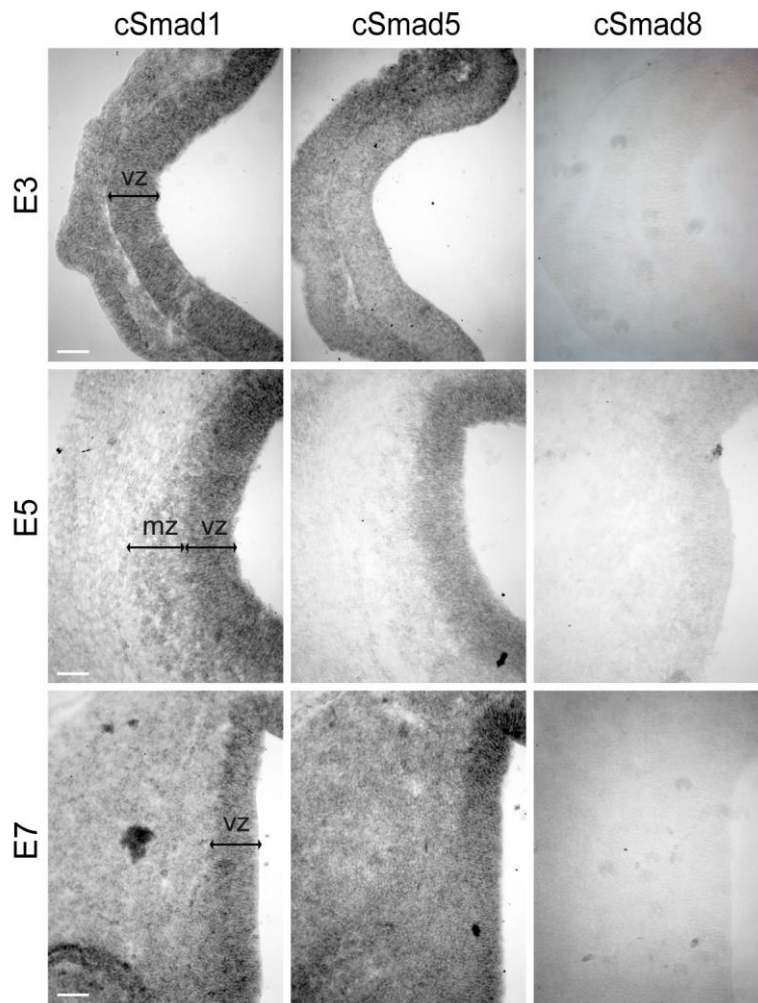

**Figure S8: Expression of cSmad1/5/8 during chick cortical neurogenesis.**

Coronal sections showing *cSmad1*, *cSmad5* and *cSmad8* transcripts detected by in situ hybridization in the developing cerebral cortex of E3, E5 and E7 chick embryos. Scale bars: 50  $\mu$ m. VZ: ventricular zone, MZ: mantle zone.



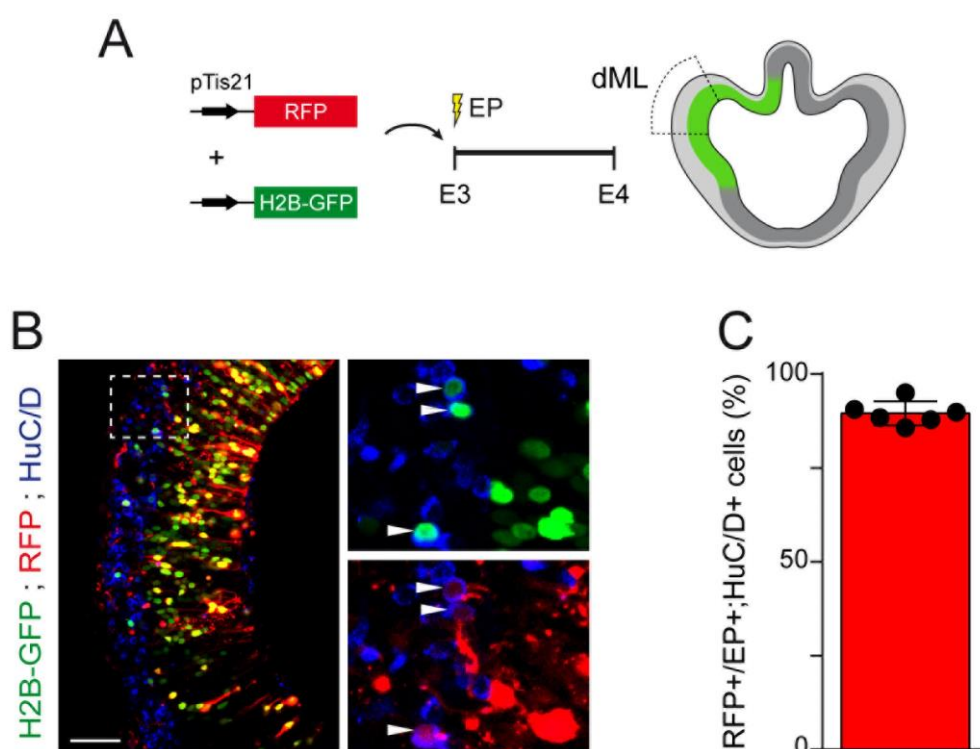

**Figure S9: The activity of the pTis21:RFP reporter identifies neurogenic divisions during early chick cortical neurogenesis.**

(A) Representation of the methodology used to identify neurogenic divisions during early chick cortical neurogenesis. The pTis21:RFP reporter was co-electroporated together with a constitutively active H2B-GFP-producing plasmid, and its activity assessed in the dorsal medial-lateral (dML) cortical region 24 hours after in ovo electroporation (IOE) of the dorsal telencephalon of E3 chick embryos. (B) Representative image of pTis21:RFP+ cells among the electroporated (H2B-GFP+) cells that differentiated into HuC/D+ neurons 24 hours later and (C) its quantification, presenting the mean proportion of RFP+ cells among H2B-GFP+;HuC/D+ cells  $\pm$  s.d, obtained from 6 electroporated embryos. Scale bars: 50  $\mu$ m.

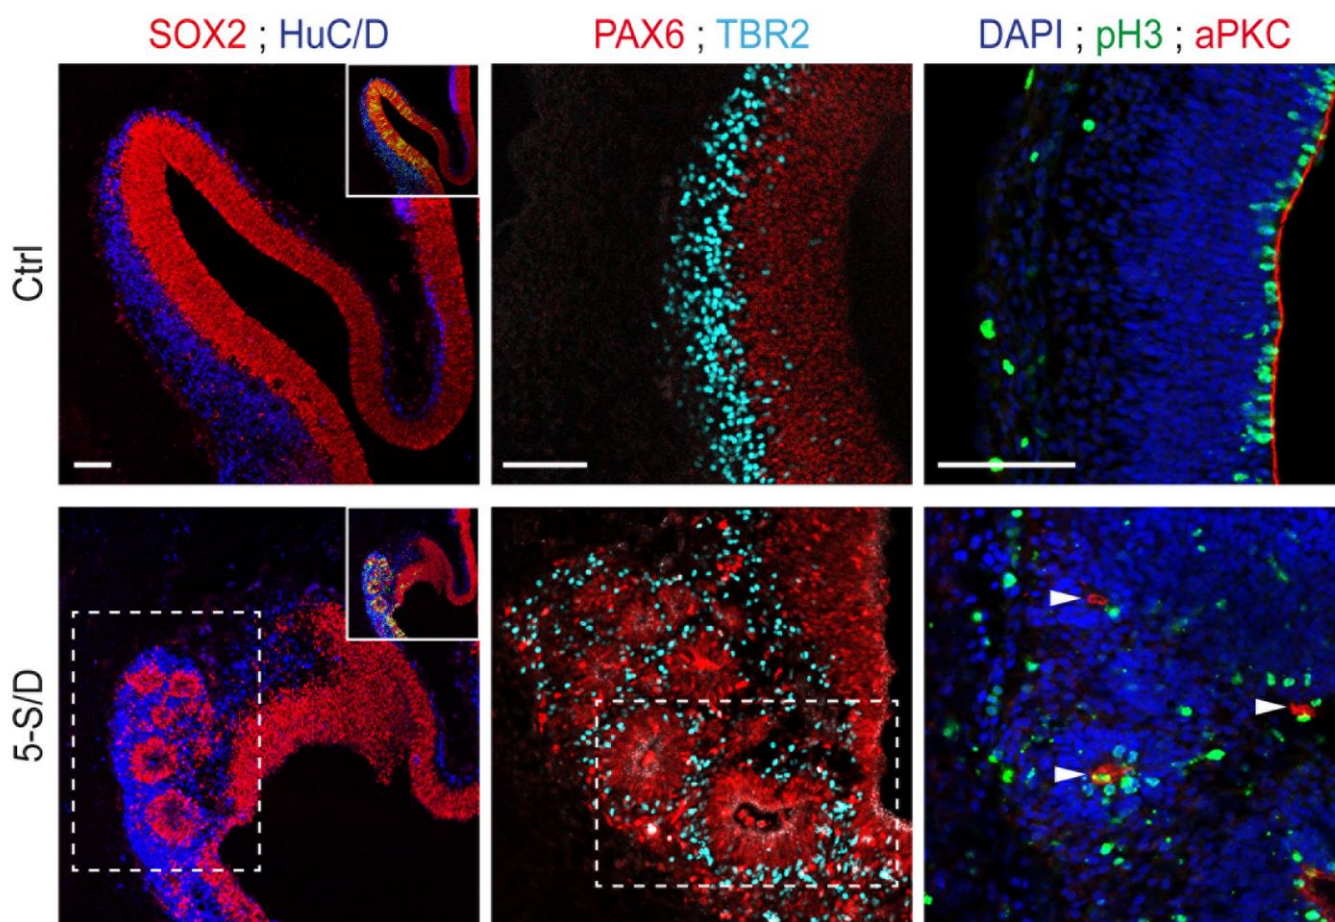

**Figure S10: Increasing SMAD5 activity causes the abnormal generation of ectopic rosettes of cortical progenitors.**

Representative images showing that IOE of SMAD5-S/D can cause the abnormal generation of ectopic rosettes of SOX2<sup>+</sup> cortical progenitors. The PAX6<sup>+</sup> and TBR2<sup>+</sup> cells forming these rosettes developed an ectopic apical-basal polarity, as revealed by immunostaining for the apical marker atypical PKC (aPKC, arrowheads), and divide mostly at the center of the rosettes (pH3<sup>+</sup>). This phenotype has been observed in the cerebral cortex of 25% (5 out of 20) of the embryos electroporated with SMAD5-SD. Scale bars: 50  $\mu$ m.

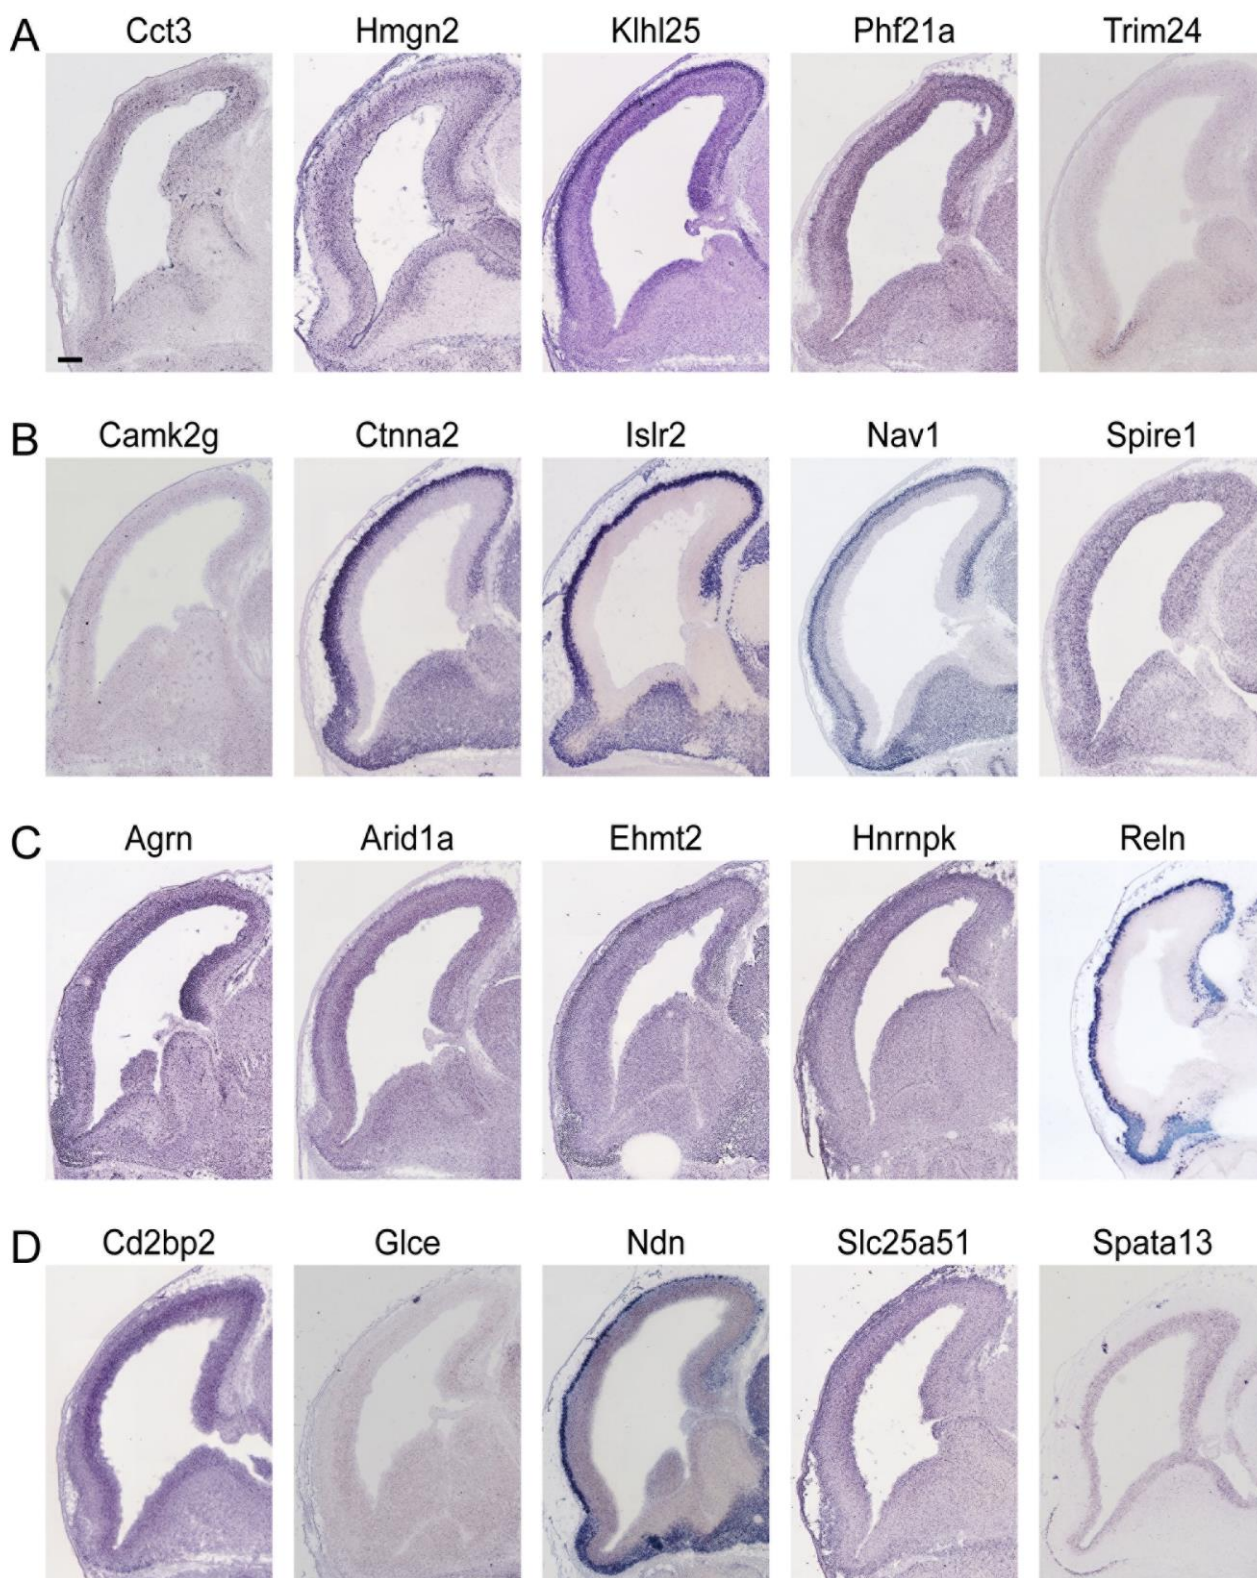

**Figure S11: Gene expression pattern of RNAseq candidates in the mouse telencephalon.**

Sagittal sections of the developing mouse dorsal telencephalon at E14.5 showing the gene expression pattern of candidates identified in the RNA-seq, including (A-C) genes whose promoters are enriched in binding motifs for TEADs and retrieved in the GO term related to (A) cellular biosynthesis such as *Cct3*,

*Hmgn2*, *Klhl25*, *Phf21a*, *Trim24*, (B) neurogenesis such as *Camk2g*, *Ctnna2*, *Islr2*, *Nav1*, *Spire1*, (C) both such as *Agrn*, *Arid1a*, *Ehmt2*, *Hnrnpk*, *Reln* and (D) genes not related to TEADs, such as *Cd2bp2*, *Glce*, *Ndn*, *Slc25a51*, *Spata13*. All the images were obtained from Genepaint (<https://gp3.mpg.de>). Scale bars: 50  $\mu\text{m}$ .

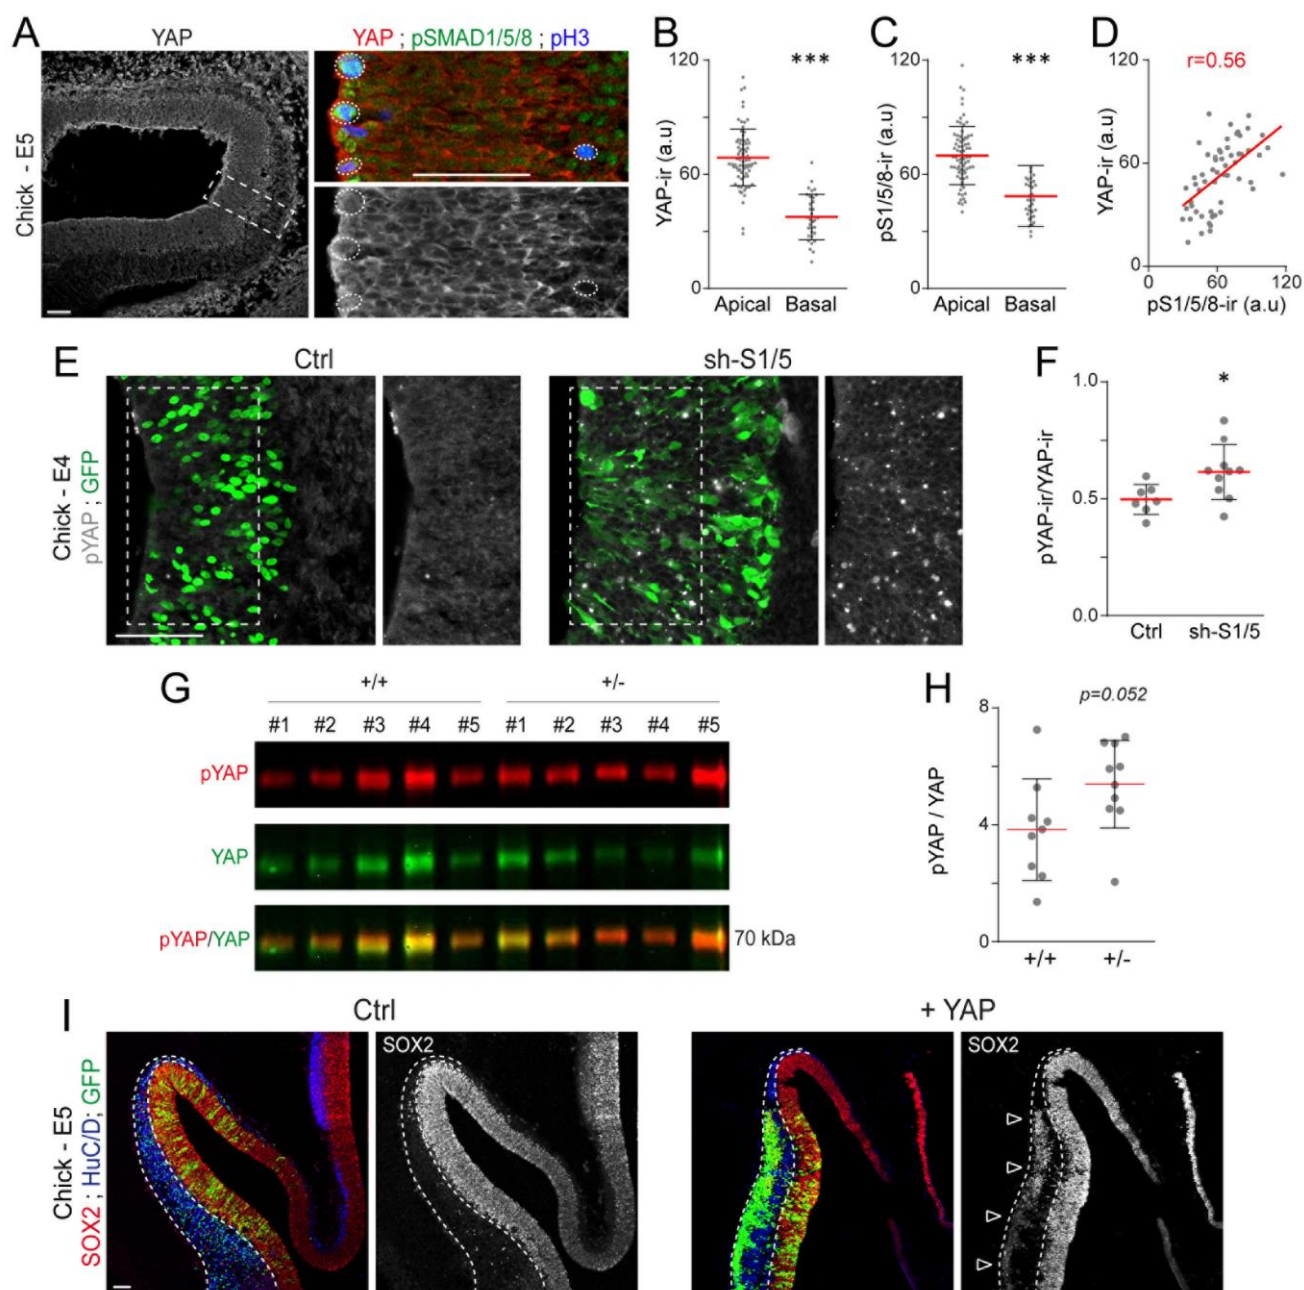

**Figure S12: SMAD1/5 regulate early cortical neurogenesis through YAP.**

(A) Expression of YAP during chick corticogenesis, relative to SMAD1/5 activity (pSMAD1/5/8). (B,C) The mean intensity  $\pm$  s.d of endogenous YAP (B) and pSMAD1/5/8 (C) immunoreactivity was quantified in 74 apical and 33 basal mitotic (pH3+) nuclei obtained from 3 chick E5 embryos. (D) The correlation between the intensity of endogenous pSMAD1/5/8 and YAP immunoreactivities was assessed by calculating the Pearson's correlation coefficient  $r$ . (E) Immunostaining of the form of YAP phosphorylated at Serine 123 (pYAP) and (F) quantification of the mean ratio  $\pm$  s.d of pYAP/YAP intensity obtained 24 hours after IOE with sh-S1/5 (10 sections from 3 embryos) or its control (7 sections from 3 embryos). (G) Western blot detection of the levels of pYAP and total YAP in extracts obtained from telencephalons of

E11.5 SmadNes mutant embryos (*Smad1<sup>wt/fl</sup>;Smad5<sup>wt/fl</sup>;Nestin:Cre<sup>+/-</sup>*, +/-) and their control littermates (*Smad1<sup>wt/fl</sup>;Smad5<sup>wt/fl</sup>;Nestin:Cre<sup>0/0</sup>*, +/+). (H) Quantification of the mean pYAP/YAP ratio  $\pm$  s.d, obtained from 10 SmadNes mutant embryos (+/-) and 9 control littermates (+/+) derived from 2 different litters. (I) Immunostaining of the developing chick cerebral cortex for SOX2+ neural progenitors and HuC/D+ differentiating neurons 48 hours after IOE with a construct overexpressing the wild type form of YAP (YAP) or a control, showing that YAP overexpression can lead to a massive ectopic delamination of SOX2+ electroporated cells in the basal part of the mantle zone. Significance was assessed with the non-parametric Mann–Whitney test (B, C, F), the two-sided unpaired t-test (D, H).\*P<0.05, \*\*\*P<0.001. Scale bars, 50  $\mu$ m.

Table S1: List of differentially expressed transcripts between cortical RGCs from SmadNes mutant and control E12.5 embryos.

[Click here to Download Table S1](#)

Table S2: Gene ontology (GO) term enrichment analysis.

[Click here to Download Table S2](#)

Table S3: Transfac/Jaspar analysis and genes whose promoters are enriched in TEAD binding motifs.

[Click here to Download Table S3](#)

Table S4: Expression of the genes of the Hippo signalling pathway in cortical RGCs from SmadNes mutant and control E12.5 embryos.

[Click here to Download Table S4](#)

| Antibody                                 | Source                              | Dilution of use             | Identifier                             |
|------------------------------------------|-------------------------------------|-----------------------------|----------------------------------------|
| anti-aPKC (mouse)                        | Santa Cruz Biotechnologies          | 1:500                       | Cat #SC-17781 (H-1);<br>RRID:AB_628148 |
| anti-BrdU (rat)                          | AbD Serotec                         | 1:100                       | Cat #MCA2060;<br>RRID:AB_323427        |
| anti-CC1/APC (mouse)                     | Millipore                           | 1:200                       | Cat #OP80;<br>RRID:AB_2057371          |
| anti-CTIP2 (rat)                         | Abcam                               | 1:500                       | Cat #ab18465;<br>RRID:AB_2064130       |
| anti-CUX1 (rabbit)                       | Proteintech                         | 1:250                       | Cat #11733-1-AP;<br>RRID:AB_2086995    |
| anti-pHistone3 (rat)                     | Sigma Aldrich                       | 1:1,000                     | Cat #H9908;<br>RRID:AB_260096          |
| anti-HuC/D (mouse)                       | Life Technologies                   | 1:1,000                     | Cat #A-21271;<br>RRID:AB_221448        |
| anti-MEF2c (rabbit)                      | Abcam                               | 1:500                       | Cat #ab64644;<br>RRID:AB_2142861       |
| anti-NeuN (mouse)                        | Millipore                           | 1:500                       | Cat #MAB377; RRID:<br>AB_2298772       |
| anti-OLIG2 (rabbit)                      | Millipore                           | 1:500                       | Cat #AB9610; RRID:<br>AB_570666        |
| anti-PAX6 (mouse)                        | DSHB                                | 1:200                       | Cat #pax6;<br>RRID:AB_528427           |
| anti-PAX6 (rabbit)                       | Covance / Biolegend                 | 1:100 (Ms)<br>1:250 (Chick) | Cat #901301;<br>RRID:AB_2565003        |
| anti-Prominin1 (rat) ;<br>APC-conjugated | eBioscience                         | 0.2 mg/ml                   | Cat #17-1331-81;<br>RRID: AB_823120    |
| anti-SATB2 (mouse)                       | Abcam                               | 1:200                       | Cat #ab51502;<br>RRID:AB_882455        |
| anti-SMAD1 (rabbit)                      | Cell Signaling Technologies         | 1:1,000                     | Cat #6944S;<br>RRID:AB_10858882        |
| anti-SMAD5 (rabbit)                      | Cell Signaling Technologies         | 1:1,000                     | Cat #12534S; RRID:<br>n.d              |
| anti-pSMAD1/5/8<br>(rabbit)              | Cell Signaling Technologies         | 1:250                       | Cat #9511;<br>RRID:AB_331671           |
| anti-SOX2 (rabbit)                       | Abcam                               | 1:500                       | Cat #ab97959;<br>RRID:AB_2341193       |
| anti-SOX9 (rabbit)                       | Kindly provided by<br>Dr. M. Wegner | 1:500                       | RRID:AB_2315360                        |
| anti-SOX10 (goat)                        | R&D Systems                         | 1:50                        | Cat #AF2864;<br>RRID:AB_442208         |
| anti-TBR1 (rabbit)                       | Abcam                               | 1:250                       | Cat #ab31940;<br>RRID:AB_2200219       |
| anti-TBR2 (rabbit)                       | Abcam                               | 1:200                       | Cat #ab23345;<br>RRID:AB_778267        |
| anti-TUBULIN-b3<br>(Tuj1) (mouse)        | Covance                             | 1:500                       | Cat #MMS-435P;<br>RRID:AB_2313773      |
| anti-Vinculin (mouse)                    | Sigma                               | 1:20,000                    | Cat #V9131; RRID:<br>AB_477629         |
| anti-YAP (mouse)                         | Santa Cruz Biotechnologies          | 1:200                       | Cat #sc-101199;<br>RRID:AB_1131430     |
| anti-pYAP (rabbit)                       | Cell Signaling Technologies         | 1:1,000                     | Cat #4911;<br>RRID:AB_2218913          |

**Table S5: List of primary antibodies used in this study.**
